# Supplementary material for: Assessing the impact of shallow subsurface pipe drainage on soil salinity and crop yield in arid zone
Source: PeerJ. 2021 Dec 14;9:e12622. doi: 10.7717/peerj.12622 (PMC8725616; doi:10.7717/peerj.12622)
Supplement: Supplemental Information 1 [file peerj-09-12622-s001.xls]

## Sheet: Data1
						Subsurface pipe drainage	CK
					Mild salinization soil	5059.2	4037.7
					Moderate salinization soil	5300.1	3419.4
						Seeding stage	Bud stage	Flowering stage	Boll stage	Desalinization rate
					0-20 cm	6.27211	3.21429	1.48649	0.546099	0.912932
					20-40 cm	4.75342	3.32143	2.21622	1.84459	0.611944
					40-60 cm	4.9863	4.28276	2.14865	2.97857	0.402649
					60-80 cm	4.37671	4.2069	1.88514	2.87143	0.34393
										0.567864
						5.2	5.20	6.12	7.8
					0-20	1.27891	1.21429	1.14865	1.21429
					20-40	0.616438	0.678571	0.641892	0.657143
					40-60	0.623288	0.62069	0.608108	0.607143
					60-80	0.547945	0.517241	0.472973	0.571429
						Seeding stage	Bud stage	Flowering stage	Boll stage
					0-20 cm	1.37518	0.867188	0.669767	0.702326	0.489286	0.512961
					20-40 cm	1.16769	0.908527	0.662016	0.939535	0.195392	0.433057
					40-60 cm	1.31852	1.2	1.06357	1.19	0.0974719	0.193363
					60-80 cm	1.21481	1.13953	0.970543	1.06202	0.12578	0.201078
										0.226982
						5.2	5.20	6.12	7.8
					0-20	0.116788	0.171875	0.167442	0.15969
					20-40	0.104615	0.105426	0.103876	0.0930233
					40-60	0.0444444	0.055814	0.0511628	0.0542636
					60-80	0.0444444	0.0573643	0.0465116	0.0465116
							5.2	5.20	6.12	7.8			0～20	≥20～40	≥40～60	≥60～80
						0-20	6.27211	3.21429	1.48649	0.546099		2014-05-02	6.27211	4.75342	4.9863	4.37671
						20-40	4.75342	3.32143	2.21622	1.84459		2014-05-20	3.21429	3.32143	4.28276	4.2069
						40-60	4.9863	4.28276	2.14865	2.97857		2014-06-12	1.48649	2.21622	2.14865	1.88514
						60-80	4.37671	4.2069	1.88514	2.87143		2014-07-08	0.546099	1.84459	2.97857	2.87143
							5.2	5.20	6.12	7.8			0-20	20-40	40-60	60-80
						0-20	1.27891	1.21429	1.14865	1.21429		2014-05-02	1.27891	0.616438	0.623288	0.547945
						20-40	0.616438	0.678571	0.641892	0.657143		2014-05-20	1.21429	0.678571	0.62069	0.517241
						40-60	0.623288	0.62069	0.608108	0.607143		2014-06-12	1.14865	0.641892	0.608108	0.472973
						60-80	0.547945	0.517241	0.472973	0.571429		2014-07-08	1.21429	0.657143	0.607143	0.571429
						0～20	≥20～40	≥40～60	≥60～80
					2014-05-02	1.37518	1.16769	1.31852	1.21481
					2014-05-20	0.867188	0.908527	1.2	1.13953
					2014-06-12	0.669767	0.662016	1.06357	0.970543
					2014-07-08	0.702326	0.939535	1.19	1.06202

## Sheet: Data2
		Date	Water sampling name	EC	pH	Soil salt change %	Date
		5.1	Irrigation water			-	2013-05-01
		5.11	Drain	8.96	8.08	-	2013-05-01
		5.13	Drain	9.02	7.08	0.8	2013-05-07
		5.14	Drain	9.06	7.08	1.3	2013-05-09
		5.15	Drain	9.17	7.69	2.6	2013-05-11
		5.16	Drain	8.84	7.38	-1.5	2013-05-13
		5.17	Drain	9.74	7.14	9.8	2013-05-15
		5.21	Drain	10.61	7.61	20.7	2013-05-19
		5.24	Drain	11.16	7.43	27.6	2013-05-22
		5.26	Drain	9.04	7.22	1	2013-05-26
		6.2	Drain	10.55	7.69	19.9	2013-06-02
		6.3	Drain	9.26	7.19	3.8	2013-06-03
		7.8	Drain	7.53	8.04	-17.9	2013-07-08
		7.11	Drain	7.95	8.19	-12.7	2013-07-11
		7.14	Drain	8.06	8.2	-11.3	2013-07-14
		7.17	Drain	8.46	7.88	-6.3	2013-07-17
		8.1	Drain	9.08	7.65	1.3	2013-08-01
		9.2	Drain	11.47	7.37	27.3	2013-09-02
		10.17	Drain	11.52	7.47	27.5	2013-10-17
				Data	EC mS/cm
				2013-05-11	8.96
				2013-05-13	9.02
				2013-05-14	9.06
				2013-05-15	9.17
				2013-05-16	8.84
				2013-05-17	9.74
				2013-05-21	10.61
				2013-05-24	11.16
				2013-05-26	9.04
				2013-06-02	10.55
				2013-06-03	9.26
				2013-07-08	7.53
				2013-07-11	7.95
				2013-07-14	8.06
				2013-07-17	8.46
				2013-08-01	9.08
				2013-09-02	11.47
				2013-10-17	11.52
